# Supplementary material for: Level of confidence in and endorsement of the health system among internet users in 12 low-income and middle-income countries
Source: PubMed Central journal article supplement (PMC7454186; doi:10.1136/bmjgh-2019-002205), 2020-08-27
Supplement: bmjgh-2019-002205supp001.pdf [file bmjgh-2019-002205supp001.pdf]

## Appendix: The level of confidence in and endorsement of the health system among internet users in 12 low- and middle-income countries

### Appendix 1: Survey of user experience, instrument

**Note:** Programming instructions are in red, response options are in italics. All questions are asked to all respondents unless otherwise noted.

---

Harvard University is studying how to make health care better in [**Country name**]. Please help us by participating in the short voluntary, anonymous survey. Your identity is completely protected.

#### Question 1.

What is your age and gender?

#### Age/gender selection

#### Question 2.

In general, would you say your health is...

- Excellent*
- Very good*
- Good*
- Fair*
- Poor*

#### Question 3.

In general, how would you rate your mental health, including your mood?

- Excellent*
- Very good*
- Good*
- Fair*
- Poor*

#### Question 4.

Where do you live?

- City*
- Town*
- Village*

#### Question 5.

What is the highest level of education you have completed?

- No formal schooling*
- Some primary school*
- Primary school completed*
- Some secondary or high school*
- Secondary or high school completed*

*Some college or university*  
*Completed college or university*

**Change names in Question 7 and 8 according to country:**

| Country      | Name      |
|--------------|-----------|
| South Africa | Junior    |
| Nigeria      | Femi      |
| Kenya        | John      |
| Senegal      | Babacar   |
| Ghana        | Afram     |
| Mexico       | Juan      |
| Argentina    | Juan      |
| India        | Krishna   |
| China        | Zhang Wei |
| Indonesia    | Panji     |
| Lebanon      | Adam      |
| Morocco      | Youssef   |

**Question 7.**

[**Anthony**] is a 45-year old man with high blood pressure who needs a regular check-up. At the health facility, the nurse

DOES: -Greet him and introduce herself -Change his medications

DOES NOT: -Ask about his symptoms -check his blood pressure

How would you rate the overall quality of care that [Anthony] received?

*Poor*

*Fair*

*Good*

*Very Good*

*Excellent*

**Question 8.**

**Randomize receipt of one of the five vignettes below:**

- a. [**Anthony**] is a 45-year old man with high blood pressure who needs a regular check-up. At the health facility, the nurse...

DOES: -check his blood pressure -Change his medications

DOES NOT: -Greet him and introduce herself -Ask about his symptoms

- b. [**Anthony**] is a 45-year old man with high blood pressure who needs a regular check-up. At the health facility, the nurse...

DOES: -Change his medications

DOES NOT: -Greet him and introduce herself -Ask about his symptoms -check his blood pressure

- c. [**Anthony**] is a 45-year old man who has hurt his arm in a motorcycle accident.

At the health facility, the nurse...

DOES: -Greet him and introduce herself -Wrap his arm with a bandage

DOES NOT: -Ask about his arm -Examine his arm

- d. **[Anthony]** is a 45-year old man who has hurt his arm in a motorcycle accident.  
At the health facility, the nurse...  
DOES: -Examine his arm - Wrap his arm with a bandage  
DOES NOT: -Greet him and introduce herself -Ask about his arm
- e. **[Anthony]** is a 45-year old man who has hurt his arm in a motorcycle accident.  
At the health facility, the nurse...  
DOES: -Wrap his arm with a bandage  
DOES NOT: -Greet him and introduce herself -Ask about his arm -Examine his arm

How would you rate the overall quality of care that **[Anthony]** received?

*Poor*  
*Fair*  
*Good*  
*Very Good*  
*Excellent*

**Question 9.**

In the **past year**, how many times did you go to a clinic, health center, or hospital to receive health care for yourself? (Please do not include any times you stayed overnight.)

0  
1  
2  
3  
4  
5  
6  
7  
8  
9  
10+

**NOTE: If Q9 = 0, skip to Q19**

**Question 10.**

What was the main reason for your last visit to a health care facility? (Excluding overnight hospital stays)

*Emergency, accident, or injury*  
*Pregnancy or delivery related*  
*Check-up, annual exam, or preventive care*  
*Chronic existing problem*  
*New health problem or question*

**Question 11.**

Who managed the last facility that you visited for care (excluding overnight hospital stays)?

*Government*  
*Private*

**Show prompt below for Questions 12-16**

Thinking about your last visit to a health care facility (not including overnight stays), how would you rate the following:

**Randomize order of Questions 12-16**

**Question 12.**

The length of time you waited before you were seen.

*Poor*

*Fair*

*Good*

*Very Good*

*Excellent*

**Question 13.**

Whether the provider listened carefully to you.

*Poor*

*Fair*

*Good*

*Very Good*

*Excellent*

**Question 14.**

Provider's medical knowledge and skills.

*Poor*

*Fair*

*Good*

*Very good*

*Excellent*

**Question 15.**

The level of respect the provider showed you.

*Poor*

*Fair*

*Good*

*Very good*

*Excellent*

**Question 16.**

The amount of time the provider spent with you in the visit.

*Poor*

*Fair*

*Good*

*Very good*

*Excellent*

**Question 17.**

Overall, taking everything into account, how would you rate the quality of care you received?

*Poor*

*Fair*

*Good*

*Very good*

*Excellent*

**Question 18.**

Overall, thinking about your entire visit, how satisfied were you with the care you received?

*Very dissatisfied*

*Somewhat dissatisfied*

*Somewhat satisfied*

*Very satisfied*

**Question 19.**

In the last year, was there a time when you had a medical problem and needed medical attention, but you did not visit a health facility?

*Yes*

*No*

*No medical problems*

**NOTE: If Q19=No or No medical problems, skip to Q21**

**Question 20.**

What is the main reason you did not visit a health facility?

What there another reason you did not visit a health facility?

What there another reason you did not visit a health facility?

**Randomize list of response options below. Allow respondents to choose option at a time, re-randomize, and ask second question.**

*None of the above*

*Too far/no transport*

*Costs are too high*

*Drugs/supplies not available*

*Health care providers lack knowledge/skills*

*Wait times are too long*

*Health care staff are disrespectful*

**Question 21.**

Have you ever been discriminated against, hassled, or made to feel inferior by a health provider/staff for any of these reasons?

- Poverty
- Religion
- Ethnicity, Language
- Immigration, Migrant status
- Because of your gender
- Type of Illness
- Education
- Romantic or Sexual attraction to someone of the same sex
- Any other reason

*Yes*

*No*

**Question 22.**

You mentioned that you were discriminated against by health providers/staff. What were the reasons? Choose as many as apply.

*Poverty*  
*Religion*  
*Ethnicity, Language*  
*Immigration, Migrant Status*  
*Education*  
*Romantic or sexual attraction to someone of the same sex*  
*Type of illness*  
*Because I am a **man/woman***  
*Other*

**Question 23.**

How confident are you that if you become very sick tomorrow, you would be able to receive effective treatment from the health system?

*Not at all confident*  
*Not very confident*  
*Somewhat confident*  
*Very confident*

**Question 24.**

With which statement do you agree most?

*Our health care system has so much wrong with it that we need **to completely rebuild it**.*  
*There are some good things in our health care system, but **major changes** are needed to make it work better.*  
*On the whole, the system works pretty well and only **minor changes** are necessary to make it work better.*

**Question 25.**

Do you have health insurance? (Any service, either from the government or a private company, that pays for some or all of your health care costs)

*Yes*  
*No*

**End survey with note below:**

Thank you for participating in this survey. We appreciate your time.

**Appendix 2: Survey instrument screen shot**

Harvard University is studying how to make health care better. Please help us by participating in this short voluntary, anonymous survey. Your identity is completely protected.

## What is your age and gender?

**Female**

|      |    |    |    |    |     |    |    |    |    |
|------|----|----|----|----|-----|----|----|----|----|
| < 14 | 14 | 15 | 16 | 17 | 18  | 19 |    |    |    |
| 20   | 21 | 22 | 23 | 24 | 25  | 26 | 27 | 28 | 29 |
| 30   | 31 | 32 | 33 | 34 | 35  | 36 | 37 | 38 | 39 |
| 40   | 41 | 42 | 43 | 44 | 45  | 46 | 47 | 48 | 49 |
| 50   | 51 | 52 | 53 | 54 | 55  | 56 | 57 | 58 | 59 |
| 60   | 61 | 62 | 63 | 64 | 65+ |    |    |    |    |

**Male**

|      |    |    |    |    |     |    |    |    |    |
|------|----|----|----|----|-----|----|----|----|----|
| < 14 | 14 | 15 | 16 | 17 | 18  | 19 |    |    |    |
| 20   | 21 | 22 | 23 | 24 | 25  | 26 | 27 | 28 | 29 |
| 30   | 31 | 32 | 33 | 34 | 35  | 36 | 37 | 38 | 39 |
| 40   | 41 | 42 | 43 | 44 | 45  | 46 | 47 | 48 | 49 |
| 50   | 51 | 52 | 53 | 54 | 55  | 56 | 57 | 58 | 59 |
| 60   | 61 | 62 | 63 | 64 | 65+ |    |    |    |    |

[Privacy Policy](#)

### Appendix 3: Survey Languages<sup>a</sup>

| Country   | Survey Language      |
|-----------|----------------------|
| Senegal   | Senegalese French    |
| Ghana     | English              |
| Kenya     | English              |
| India     | English <sup>b</sup> |
| Nigeria   | English              |
| Morocco   | Moroccan Arabic      |
| Indonesia | Bahasa               |
| S. Africa | English              |
| Lebanon   | Lebanese Arabic      |
| China     | Chinese              |
| Mexico    | Mexican Spanish      |
| Argentina | Argentine Spanish    |

a – Languages were chosen based on most commonly spoken language in country

b - Previous experience with internet surveys in India by the RIWI Corp showed that, when given a choice, Indian internet respondents overwhelmingly selected English

### Appendix 4: Internet penetration rates in survey countries

| Country      | Internet penetration (2016) |
|--------------|-----------------------------|
| Senegal      | 23.4%                       |
| Ghana        | 28.4%                       |
| Kenya        | 45.0%                       |
| India        | 34.8%                       |
| Nigeria      | 46.1%                       |
| Morocco      | 57.6%                       |
| Indonesia    | 20.4%                       |
| South Africa | 52.0%                       |
| Lebanon      | 75.9%                       |
| China        | 52.2%                       |

|           |       |
|-----------|-------|
| Mexico    | 45.1% |
| Argentina | 69.2% |

[www.internetlivestats.com](http://www.internetlivestats.com)

## Appendix 5: Expanded methods

### *Reproducibility*

In a study of global mental health stigma<sup>1</sup>, researchers tested the reproducibility of responses produced by RDIT™ sampling methods. A short survey was fielded every month for 21 consecutive months in India. Responses were very similar across the survey months; 31.1 +/- .18% s.e. replied yes to the question, “is there someone you interact with every day who suffers from mental illness?” An average of 10.1 +/- .11% s.e. said that “people who suffer from mental illness are more violent.” The group also compared global responses excluding India between June and July of 2014 and June and July of 2015 and found no statistically significant differences for any of their questions.

### *Habitual respondents*

A study of RDIT™ in 2014<sup>2</sup> asked 50,313 respondents the following question: “prior to this survey when was the last time you answered survey questions?” 72% of respondents had not taken a survey in the last month and 47% of respondents had never taken a survey before.

### *Representativeness*

An independent research group analyzed the cookies produced by the RDIT™ sample over the course of one week in 2013<sup>3</sup> and found highly statistically significant correlations with characteristics of the U.S. internet using population. The group matched a total of 115,000 unique cookies. Almost complete convergence (correlations between .915 and .997) was found between the two samples when looking at the internet service providers, geographic distribution, number of cookie hits and age of the cookies.

### *Anchor vignettes*

Anchoring vignettes can be included in surveys that compare self-reported health across countries or groups of people that are likely to have differing norms and expectations. The anchoring vignette allows researchers to control for these factors, identify comparable cut-off points between ordinal response categories, and make interpersonal comparisons despite social difference in response characteristics.

### *Sampling weight construction*

The age and gender weight targets were created based on the [Census Bureau's 2017 Population Estimates of the country's population](#). The urban and rural targets were created based on the Central Intelligence Agency database. The education targets for most countries were created based on educational attainment data from the UNESCO Institute for Statistics. Education targets for Nigeria were created based on data from the Demographic and Health Survey conducted by the National Population Commission of Nigeria and education targets for Morocco were based on educational enrolment data from the High Commission for the Plan of Morocco.

## Appendix 6: Conceptual framework



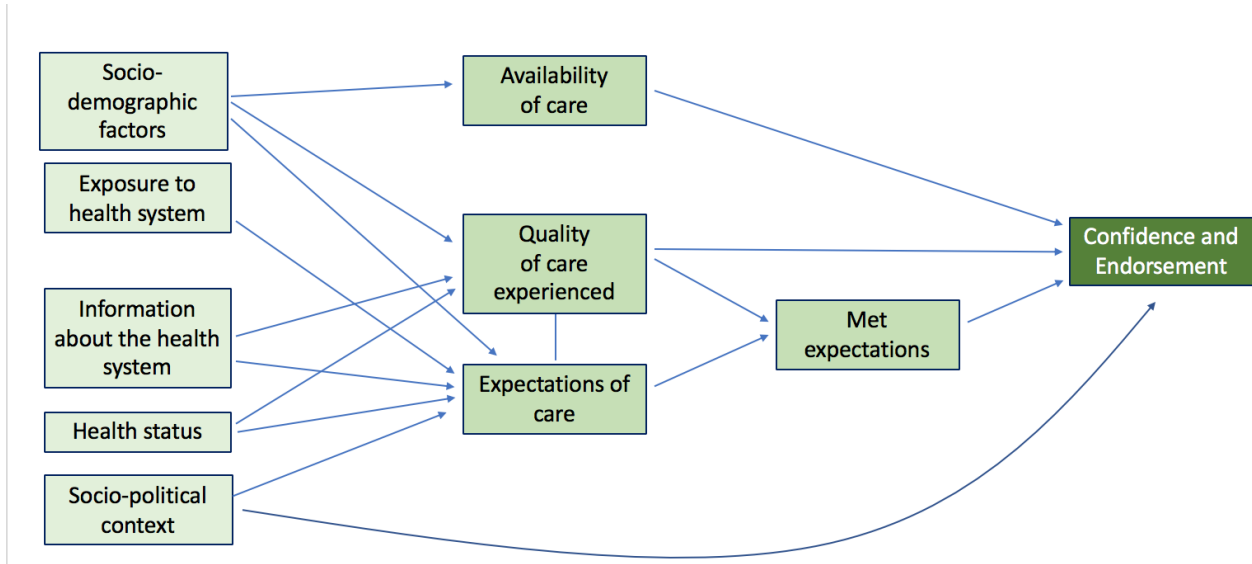

## Appendix 7: Sample characteristics without population weights

|                                                      | Argentina |     | China |     | Ghana |     | India |     | Indonesia |     | Kenya |     | Lebanon |     | Mexico |     | Morocco |     | Nigeria |     | Senegal |     | South Africa |     | Total  |     |  |
|------------------------------------------------------|-----------|-----|-------|-----|-------|-----|-------|-----|-----------|-----|-------|-----|---------|-----|--------|-----|---------|-----|---------|-----|---------|-----|--------------|-----|--------|-----|--|
|                                                      | N         | %   | N     | %   | N     | %   | N     | %   | N         | %   | N     | %   | N       | %   | N      | %   | N       | %   | N       | %   | N       | %   | N            | %   | N      | %   |  |
| N respondents                                        | 1,153     |     | 1,422 |     | 1,048 |     | 1,321 |     | 1,179     |     | 1,106 |     | 1,003   |     | 1,239  |     | 1,124   |     | 1,166   |     | 1,019   |     | 1,069        |     | 13,849 |     |  |
| Socio-demographics                                   |           |     |       |     |       |     |       |     |           |     |       |     |         |     |        |     |         |     |         |     |         |     |              |     |        |     |  |
| Age: 18-29                                           | 471       | 41% | 858   | 60% | 715   | 68% | 879   | 67% | 758       | 64% | 693   | 63% | 559     | 56% | 656    | 53% | 667     | 59% | 777     | 67% | 598     | 59% | 627          | 59% | 8258   | 60% |  |
| 30-49                                                | 438       | 38% | 456   | 32% | 279   | 27% | 360   | 27% | 356       | 30% | 342   | 31% | 338     | 34% | 398    | 32% | 340     | 30% | 336     | 29% | 319     | 31% | 370          | 35% | 4332   | 31% |  |
| 50+                                                  | 244       | 21% | 108   | 8%  | 54    | 5%  | 82    | 6%  | 65        | 6%  | 71    | 6%  | 106     | 11% | 185    | 15% | 117     | 10% | 53      | 5%  | 102     | 10% | 72           | 7%  | 1259   | 9%  |  |
| Female                                               | 419       | 36% | 276   | 19% | 251   | 24% | 294   | 22% | 288       | 24% | 351   | 32% | 275     | 27% | 432    | 35% | 326     | 29% | 283     | 24% | 288     | 28% | 476          | 45% | 3959   | 29% |  |
| Rural                                                | 157       | 14% | 220   | 15% | 70    | 7%  | 199   | 15% | 245       | 21% | 204   | 18% | 164     | 16% | 161    | 13% | 118     | 10% | 47      | 4%  | 71      | 7%  | 260          | 24% | 1916   | 14% |  |
| Secondary or more education                          | 958       | 83% | 1232  | 87% | 997   | 95% | 1211  | 92% | 1103      | 94% | 102   | 92% | 782     | 78% | 1077   | 87% | 954     | 85% | 1132    | 97% | 896     | 88% | 102          | 95% | 12383  | 89% |  |
| Good self-rated health status                        | 952       | 83% | 1079  | 76% | 940   | 90% | 1097  | 83% | 839       | 71% | 984   | 89% | 877     | 87% | 1031   | 83% | 844     | 75% | 1084    | 93% | 822     | 81% | 918          | 86% | 11467  | 83% |  |
| Experience with health care system                   |           |     |       |     |       |     |       |     |           |     |       |     |         |     |        |     |         |     |         |     |         |     |              |     |        |     |  |
| Did not visit health system in past year             | 328       | 28% | 643   | 45% | 358   | 34% | 466   | 35% | 541       | 46% | 353   | 32% | 504     | 50% | 377    | 30% | 568     | 51% | 412     | 35% | 430     | 42% | 337          | 32% | 5317   | 38% |  |
| N visits in past year (mean/sd)                      | 2.9       | 3.0 | 2.0   | 2.8 | 2.0   | 2.5 | 2.4   | 2.9 | 1.7       | 2.5 | 2.2   | 2.6 | 1.7     | 2.6 | 2.6    | 2.9 | 1.7     | 2.5 | 2.4     | 2.7 | 1.6     | 2.1 | 2.7          | 3.0 | 2.2    | 2.7 |  |
| Last visit was to private facility*                  | 469       | 57% | 240   | 31% | 328   | 48% | 638   | 75% | 345       | 54% | 449   | 60% | 334     | 67% | 315    | 37% | 267     | 48% | 427     | 57% | 265     | 45% | 224          | 31% | 4301   | 50% |  |
| Has health insurance                                 | 801       | 69% | 1011  | 71% | 748   | 71% | 597   | 45% | 679       | 58% | 584   | 53% | 507     | 51% | 782    | 63% | 543     | 48% | 350     | 30% | 417     | 41% | 313          | 29% | 7332   | 53% |  |
| Perceptions of health care system                    |           |     |       |     |       |     |       |     |           |     |       |     |         |     |        |     |         |     |         |     |         |     |              |     |        |     |  |
| Quality of last visit good, very good, or excellent* | 690       | 84% | 527   | 68% | 632   | 92% | 694   | 81% | 444       | 70% | 628   | 83% | 402     | 81% | 649    | 75% | 295     | 53% | 673     | 89% | 457     | 78% | 609          | 83% | 6700   | 79% |  |
| Ever experienced discrimination                      | 201       | 17% | 386   | 27% | 231   | 22% | 356   | 27% | 288       | 24% | 215   | 19% | 216     | 22% | 256    | 21% | 364     | 32% | 218     | 19% | 167     | 16% | 208          | 19% | 3106   | 22% |  |
| Vignette rating of good or better                    | 512       | 44% | 662   | 47% | 471   | 45% | 737   | 56% | 586       | 50% | 391   | 35% | 532     | 53% | 563    | 45% | 389     | 35% | 574     | 49% | 437     | 43% | 505          | 47% | 6359   | 46% |  |
| Very confident could receive effective care          | 295       | 26% | 330   | 23% | 520   | 50% | 450   | 34% | 338       | 29% | 432   | 39% | 362     | 36% | 255    | 21% | 171     | 15% | 606     | 52% | 270     | 26% | 523          | 49% | 4552   | 33% |  |
| Agrees system works pretty well                      | 353       | 31% | 539   | 38% | 342   | 33% | 451   | 34% | 520       | 44% | 380   | 34% | 407     | 41% | 284    | 23% | 216     | 19% | 377     | 32% | 248     | 24% | 390          | 36% | 4507   | 33% |  |

\*Denominator is respondents who visited a health care facility in the past 12 months. See appendix 1 for full survey instrument.

**Appendix 8: STROBE Statement—Checklist of items that should be included in reports of cross-sectional studies**

|                           | <b>Item No</b> | <b>Recommendation</b>                                                                                                                                                                | <b>Section, paragraph</b> |
|---------------------------|----------------|--------------------------------------------------------------------------------------------------------------------------------------------------------------------------------------|---------------------------|
| <b>Title and abstract</b> | 1              | (a) Indicate the study's design with a commonly used term in the title or the abstract                                                                                               | Title                     |
|                           |                | (b) Provide in the abstract an informative and balanced summary of what was done and what was found                                                                                  | Abstract                  |
| <b>Introduction</b>       |                |                                                                                                                                                                                      |                           |
| Background/rationale      | 2              | Explain the scientific background and rationale for the investigation being reported                                                                                                 | Introduction<br>Para 1-4  |
| Objectives                | 3              | State specific objectives, including any prespecified hypotheses                                                                                                                     | Introduction<br>Para 3    |
| <b>Methods</b>            |                |                                                                                                                                                                                      |                           |
| Study design              | 4              | Present key elements of study design early in the paper                                                                                                                              | Methods<br>Para 1-10      |
| Setting                   | 5              | Describe the setting, locations, and relevant dates, including periods of recruitment, exposure, follow-up, and data collection                                                      | Methods<br>Para 1         |
| Participants              | 6              | (a) Give the eligibility criteria, and the sources and methods of selection of participants                                                                                          | Methods<br>Para 1-2       |
| Variables                 | 7              | Clearly define all outcomes, exposures, predictors, potential confounders, and effect modifiers. Give diagnostic criteria, if applicable                                             | Methods<br>Para 6-8       |
| Data sources/ measurement | 8*             | For each variable of interest, give sources of data and details of methods of assessment (measurement). Describe comparability of assessment methods if there is more than one group | Methods<br>Para 6-8       |
| Bias                      | 9              | Describe any efforts to address potential sources of bias                                                                                                                            | Methods<br>Para 8         |
| Study size                | 10             | Explain how the study size was arrived at                                                                                                                                            | Methods<br>Para 1         |
| Quantitative variables    | 11             | Explain how quantitative variables were handled in the analyses. If applicable, describe which groupings were chosen and why                                                         | Methods<br>Para 6-8       |
| Statistical methods       | 12             | (a) Describe all statistical methods, including those used to control for confounding                                                                                                | Methods<br>Para 8-10      |
|                           |                | (b) Describe any methods used to examine subgroups and interactions                                                                                                                  | Methods<br>Para 9         |
|                           |                | (c) Explain how missing data were addressed                                                                                                                                          | Results<br>N/A            |
|                           |                | (d) If applicable, describe analytical methods taking account of sampling strategy                                                                                                   | Methods<br>Para 9         |
|                           |                | (e) Describe any sensitivity analyses                                                                                                                                                | Results<br>Para 4         |

| <b>Results</b>           |     |                                                                                                                                                                                                              |                        |
|--------------------------|-----|--------------------------------------------------------------------------------------------------------------------------------------------------------------------------------------------------------------|------------------------|
| Participants             | 13* | (a) Report numbers of individuals at each stage of study—eg numbers potentially eligible, examined for eligibility, confirmed eligible, included in the study, completing follow-up, and analysed            | Results<br>Para 1      |
|                          |     | (b) Give reasons for non-participation at each stage                                                                                                                                                         | Results<br>Para 1      |
|                          |     | (c) Consider use of a flow diagram                                                                                                                                                                           |                        |
| Descriptive data         | 14* | (a) Give characteristics of study participants (eg demographic, clinical, social) and information on exposures and potential confounders                                                                     | Results<br>Para 1      |
|                          |     | (b) Indicate number of participants with missing data for each variable of interest                                                                                                                          | n/a                    |
| Outcome data             | 15* | Report numbers of outcome events or summary measures                                                                                                                                                         | Results<br>Para 3      |
| Main results             | 16  | (a) Give unadjusted estimates and, if applicable, confounder-adjusted estimates and their precision (eg, 95% confidence interval). Make clear which confounders were adjusted for and why they were included | Results<br>Para 3-4    |
|                          |     | (b) Report category boundaries when continuous variables were categorized                                                                                                                                    | Results<br>Para 4      |
|                          |     | (c) If relevant, consider translating estimates of relative risk into absolute risk for a meaningful time period                                                                                             | n/a                    |
| Other analyses           | 17  | Report other analyses done—eg analyses of subgroups and interactions, and sensitivity analyses                                                                                                               | Results<br>Para 3-4    |
| <b>Discussion</b>        |     |                                                                                                                                                                                                              |                        |
| Key results              | 18  | Summarise key results with reference to study objectives                                                                                                                                                     | Discussion<br>Para 1   |
| Limitations              | 19  | Discuss limitations of the study, taking into account sources of potential bias or imprecision. Discuss both direction and magnitude of any potential bias                                                   | Discussion<br>Para 4   |
| Interpretation           | 20  | Give a cautious overall interpretation of results considering objectives, limitations, multiplicity of analyses, results from similar studies, and other relevant evidence                                   | Discussion<br>Para 6-8 |
| Generalisability         | 21  | Discuss the generalisability (external validity) of the study results                                                                                                                                        | Discussion<br>Para 4   |
| <b>Other information</b> |     |                                                                                                                                                                                                              |                        |
| Funding                  | 22  | Give the source of funding and the role of the funders for the present study and, if applicable, for the original study on which the present article is based                                                | End matter             |

\*Source: <http://www.equator-network.org/reporting-guidelines/strobe/>

**Appendix 9: Weighted analytic sample characteristics, excluding respondents who had not visited a health facility in the last year**

|                                                    | Argentina |     | China |     | Ghana |     | India |     | Indonesia |     | Kenya |     | Lebanon |     | Mexico |     | Morocco |     | Nigeria |     | Senegal |     | South Africa |     | Total |     |
|----------------------------------------------------|-----------|-----|-------|-----|-------|-----|-------|-----|-----------|-----|-------|-----|---------|-----|--------|-----|---------|-----|---------|-----|---------|-----|--------------|-----|-------|-----|
|                                                    | N         | %   | N     | %   | N     | %   | N     | %   | N         | %   | N     | %   | N       | %   | N      | %   | N       | %   | N       | %   | N       | %   | N            | %   | N     | %   |
| N respondents                                      | 825       |     | 779   |     | 690   |     | 855   |     | 638       |     | 753   |     | 499     |     | 862    |     | 556     |     | 754     |     | 589     |     | 732          |     | 8532  |     |
| Socio-demographics                                 |           |     |       |     |       |     |       |     |           |     |       |     |         |     |        |     |         |     |         |     |         |     |              |     |       |     |
| Age: 18-29                                         | 163       | 26% | 197   | 29% | 303   | 52% | 316   | 39% | 186       | 28% | 327   | 46% | 137     | 29% | 278    | 36% | 196     | 34% | 407     | 54% | 175     | 37% | 279          | 40% | 2964  | 38% |
| 30-49                                              | 271       | 43% | 300   | 44% | 230   | 40% | 399   | 49% | 255       | 39% | 340   | 48% | 232     | 48% | 347    | 45% | 287     | 50% | 286     | 38% | 236     | 50% | 322          | 47% | 3506  | 45% |
| 50+                                                | 193       | 31% | 193   | 28% | 47    | 8%  | 95    | 12% | 213       | 33% | 44    | 6%  | 110     | 23% | 149    | 19% | 88      | 15% | 65      | 9%  | 63      | 13% | 88           | 13% | 1348  | 17% |
| Female                                             | 403       | 49% | 419   | 53% | 252   | 42% | 475   | 55% | 393       | 56% | 372   | 51% | 280     | 52% | 453    | 51% | 405     | 62% | 280     | 36% | 285     | 58% | 405          | 54% | 4421  | 51% |
| Rural                                              | 50        | 6%  | 315   | 40% | 197   | 33% | 499   | 58% | 448       | 64% | 553   | 76% | 61      | 11% | 149    | 17% | 294     | 45% | 216     | 28% | 241     | 49% | 276          | 37% | 3299  | 38% |
| Secondary or more education                        | 486       | 60% | 509   | 65% | 454   | 76% | 330   | 38% | 337       | 48% | 274   | 37% | 337     | 62% | 550    | 62% | 231     | 35% | 637     | 83% | 132     | 27% | 667          | 89% | 4944  | 58% |
| Good self-rated health status                      | 632       | 77% | 582   | 74% | 518   | 87% | 512   | 59% | 450       | 64% | 487   | 66% | 426     | 79% | 664    | 74% | 343     | 53% | 635     | 83% | 365     | 74% | 594          | 80% | 6206  | 72% |
| Experience with healthcare system                  |           |     |       |     |       |     |       |     |           |     |       |     |         |     |        |     |         |     |         |     |         |     |              |     |       |     |
| N visits in past year (mean/sd)                    | 4.4       | 3.0 | 3.9   | 2.7 | 3.2   | 2.4 | 5.5   | 3.1 | 4.1       | 2.8 | 3.8   | 3.0 | 3.3     | 2.5 | 4.1    | 2.9 | 4.6     | 3.1 | 3.7     | 2.6 | 4.1     | 3.2 | 4.1          | 3.0 | 4.1   | 3.0 |
| Last visit was to private facility                 | 409       | 50% | 238   | 30% | 271   | 46% | 492   | 57% | 509       | 72% | 300   | 41% | 342     | 63% | 328    | 37% | 266     | 41% | 428     | 56% | 235     | 48% | 219          | 29% | 4036  | 47% |
| Has health insurance                               | 594       | 73% | 544   | 69% | 402   | 68% | 308   | 36% | 327       | 46% | 280   | 38% | 237     | 44% | 546    | 61% | 324     | 50% | 318     | 41% | 280     | 57% | 235          | 31% | 4395  | 51% |
| Perceptions of healthcare system                   |           |     |       |     |       |     |       |     |           |     |       |     |         |     |        |     |         |     |         |     |         |     |              |     |       |     |
| Quality of last visit good, very good or excellent | 698       | 86% | 462   | 59% | 543   | 91% | 549   | 63% | 471       | 67% | 527   | 72% | 409     | 75% | 612    | 69% | 320     | 49% | 658     | 86% | 399     | 81% | 599          | 80% | 6246  | 73% |
| Ever experienced discrimination                    | 165       | 20% | 334   | 43% | 154   | 26% | 242   | 28% | 292       | 41% | 206   | 28% | 152     | 28% | 229    | 26% | 229     | 35% | 213     | 28% | 126     | 25% | 176          | 24% | 2517  | 29% |
| Vignette rating of good or better                  | 447       | 55% | 384   | 49% | 316   | 53% | 469   | 54% | 408       | 58% | 270   | 37% | 275     | 51% | 454    | 51% | 281     | 43% | 404     | 53% | 359     | 73% | 362          | 49% | 4428  | 52% |
| Very confident could receive effective care        | 214       | 26% | 146   | 19% | 311   | 52% | 137   | 16% | 154       | 22% | 332   | 45% | 150     | 28% | 199    | 22% | 117     | 18% | 368     | 48% | 237     | 48% | 338          | 45% | 2703  | 31% |
| Agrees system works pretty well                    | 251       | 31% | 184   | 23% | 158   | 27% | 266   | 31% | 261       | 37% | 240   | 33% | 198     | 36% | 232    | 26% | 185     | 28% | 241     | 31% | 238     | 48% | 261          | 35% | 2715  | 32% |

**Appendix 10: Quality rating correlation matrix**

|                          | Overall quality | Wait time | Provider knowledge | Provider listening | Time spent with provider | Provider respect |
|--------------------------|-----------------|-----------|--------------------|--------------------|--------------------------|------------------|
| Overall quality          | 1               |           |                    |                    |                          |                  |
| Wait time                | 0.63            | 1         |                    |                    |                          |                  |
| Provider knowledge       | 0.66            | 0.61      | 1                  |                    |                          |                  |
| Provider listening       | 0.67            | 0.57      | 0.66               | 1                  |                          |                  |
| Time spent with provider | 0.66            | 0.64      | 0.68               | 0.68               | 1                        |                  |
| Provider respect         | 0.65            | 0.58      | 0.70               | 0.68               | 0.67                     | 1                |

**Appendix 11: Comparison of confidence and endorsement by use of the health system in the past year**

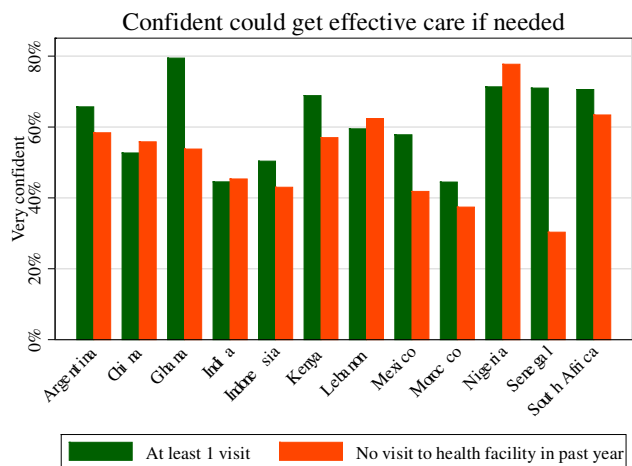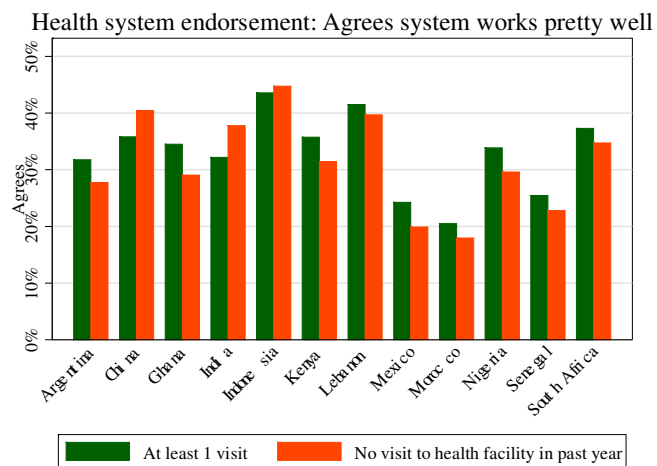

**Appendix 12: Sensitivity analysis using response options of “Somewhat confident or “Very confident”**

|                                                     | Somewhat or very confident |             |
|-----------------------------------------------------|----------------------------|-------------|
|                                                     | Odds Ratio                 | 95% CI      |
| Experience with health system                       |                            |             |
| Quality of last visit good, very good, or excellent | 4.10                       | [3.57,4.71] |
| Ever experienced discrimination                     | 0.50                       | [0.43,0.59] |
| 3 or more visits to health facility                 | 0.98                       | [0.89,1.08] |
| Has health insurance                                | 2.26                       | [1.99,2.58] |
| Last visit was to private facility                  | 0.99                       | [0.87,1.11] |
| Vignette rating of good or better                   | 1.56                       | [1.29,1.88] |
| Socio-demographic characteristics                   |                            |             |
| Female                                              | 0.91                       | [0.82,1.01] |
| Age (18-29 ref)                                     |                            |             |
| 30-49                                               | 0.92                       | [0.85,1.00] |
| 50+                                                 | 1.16                       | [0.88,1.53] |
| Secondary or higher education                       | 1.26                       | [1.06,1.49] |
| Rural                                               | 0.88                       | [0.76,1.02] |
| Good self-rated health                              | 1.44                       | [1.27,1.64] |
| Country (Senegal ref)                               |                            |             |
| Ghana                                               | 1.56                       | [1.50,1.63] |
| Kenya                                               | 1.55                       | [1.49,1.61] |
| India                                               | 1.05                       | [1.01,1.09] |
| Nigeria                                             | 1.74                       | [1.65,1.83] |
| Morocco                                             | 0.55                       | [0.53,0.58] |
| Indonesia                                           | 1.15                       | [1.10,1.20] |
| South Africa                                        | 1.98                       | [1.90,2.05] |
| Lebanon                                             | 0.98                       | [0.95,1.01] |
| China                                               | 1.14                       | [1.07,1.21] |
| Mexico                                              | 0.66                       | [0.64,0.69] |
| Argentina                                           | 0.83                       | [0.79,0.87] |
| N                                                   | 8531                       |             |



### Works Cited

1. Seeman N, Tang S, Brown AD, Ing A. World survey of mental illness stigma. *Journal of Affective Disorders* 2016; **190**: 115-21.
2. Murphy L., Pospichal L., Liebenson D., Meerkamper E. GRIT Consumer Participation in Research Report: A Global Study of Habitual vs. Non-Habitual Survey Takers. New York, NY: Greenbook and RIWI, 2014.
3. ComScore. Representativeness of the RIWI Sampling Methodology in the United States, 2014.
